# Supplementary material
Source: publisher figshare collection journal article supplement (https://sage.figshare.com/ndownloader/files/17428310)

## SUPPLEMENTARY DATA

### A brief up-to-date overview of Amaryllidaceae alkaloids: Phytochemical studies of *Narcissus tazetta* subsp. *tazetta* L., collected in Turkey

Çiğdem Karakoyun <sup>a</sup>, Marco Masi<sup>b</sup>, Alessio Cimmino<sup>b</sup>, Mustafa Ali Önür<sup>a</sup>, Nehir Unver Somer<sup>a</sup>, Alexander Kornienko<sup>c</sup> and Antonio Evidente <sup>a,\*</sup>

<sup>a</sup>*Department of Pharmacognosy, Faculty of Pharmacy, Ege University, 35100 İzmir/ Turkey*

<sup>b</sup>*Department of Chemical Sciences, University of Naples Federico II, Complesso Universitario Monte San'Angelo, Via Cintia 4, 80126, Naples, Italy*

<sup>c</sup>*Department of Chemistry and Biochemistry, Texas State University, San Marcos, TX 78666, United States*

[evidente@unina.it](mailto:evidente@unina.it)

**Figure S1.** ESI MS spectrum of lycorine (**1**) recorded in positive modality.

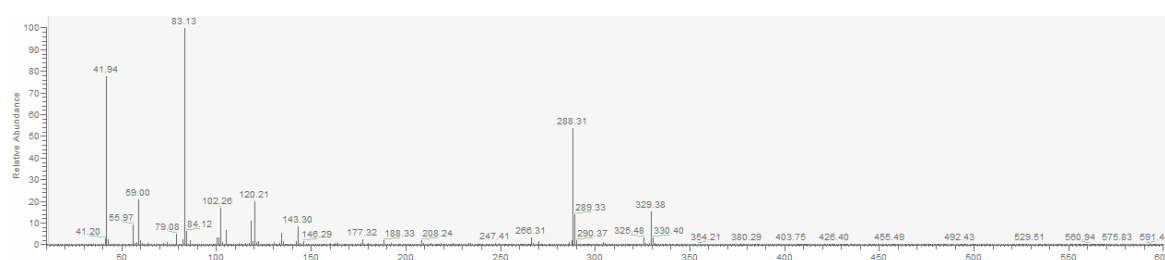

**Figure S2.**  $^1\text{H}$  NMR spectrum of lycorine (**1**) ( $\text{CD}_3\text{OD}$  on 400 MHz).

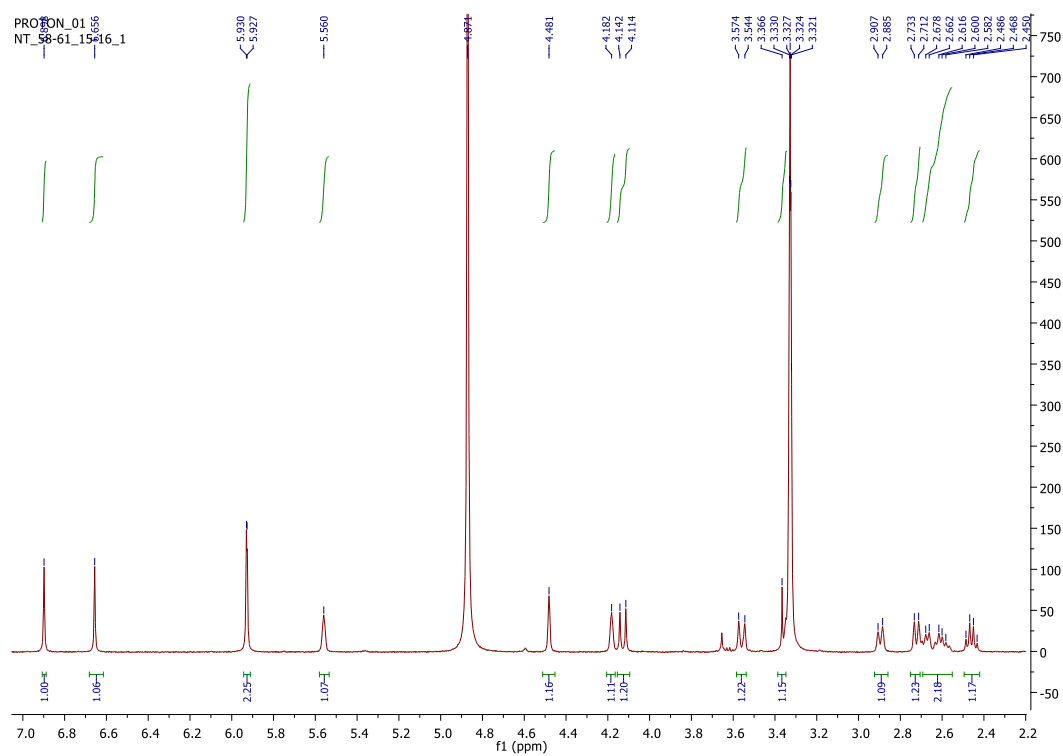

**Figure S3.** ESI MS spectrum of pseudolycorine (**21**) recorded in positive modality.

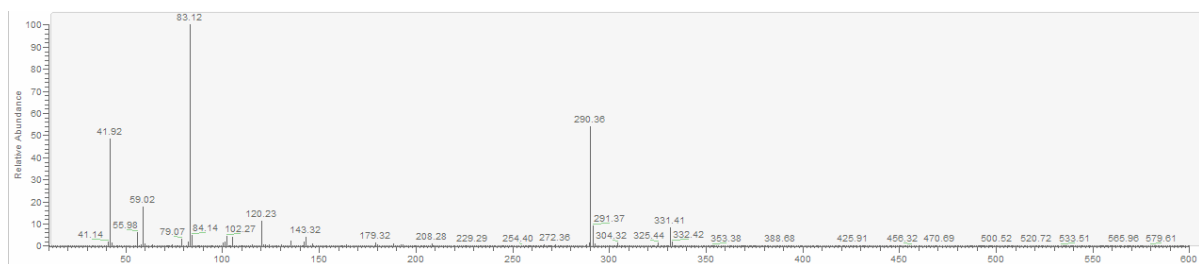

**Figure S4.**  $^1\text{H}$  NMR spectrum of pseudolycorine (**21**) ( $\text{CD}_3\text{OD}$  on 500 MHz).

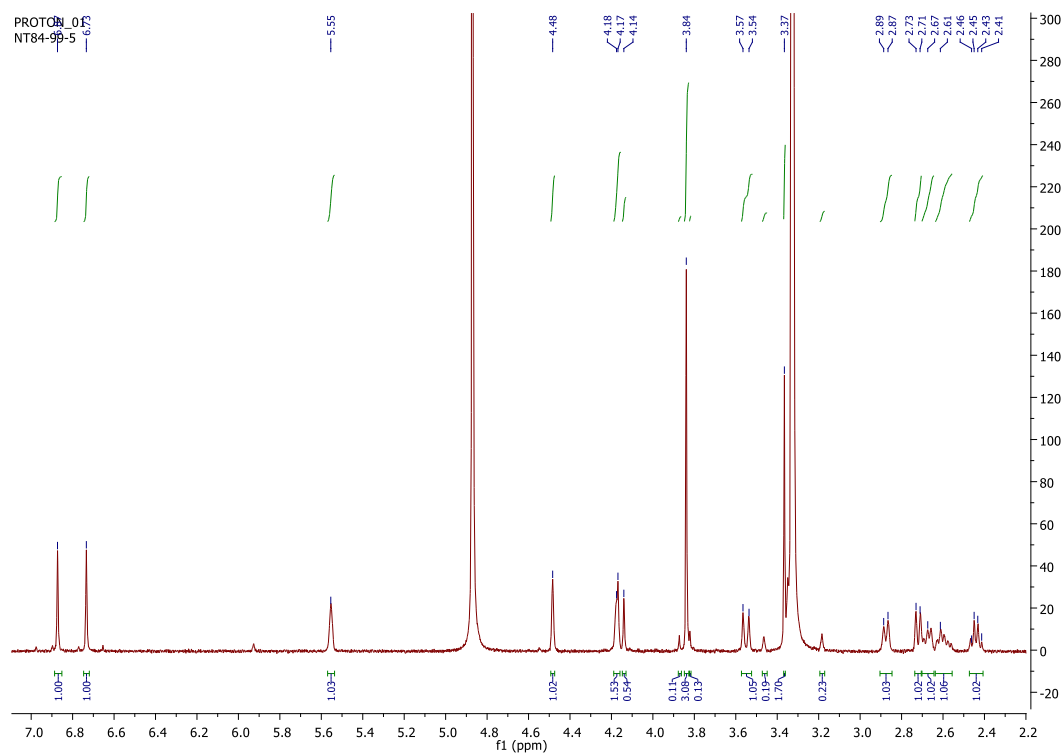

**Figure S5.** ESI MS spectrum of galanthamine (**22**) recorded in positive modality.

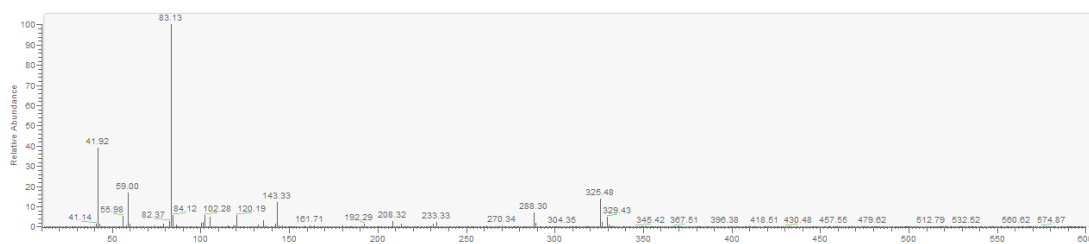

**Figure S6.**  $^1\text{H}$  NMR spectrum of galanthamine (**22**) ( $\text{CD}_3\text{OD}$  on 400 MHz).

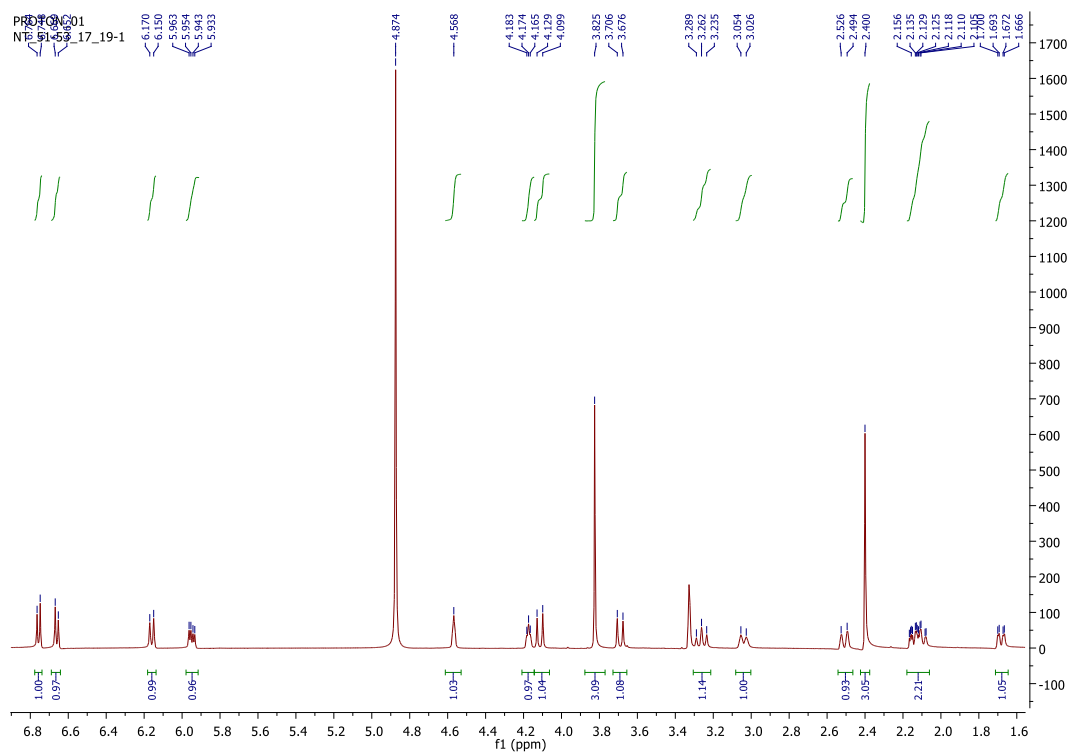

**Figure S7.** ESI MS spectrum of 11-hydroxygalanthine (**23**) recorded in positive modality.

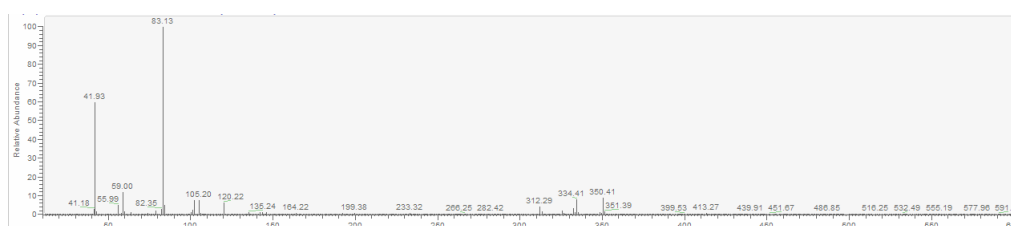

**Figure S8.**  $^1\text{H}$  NMR spectrum of 11-hydroxygalanthine (**23**) ( $\text{CD}_3\text{OD}$  on 400 MHz).

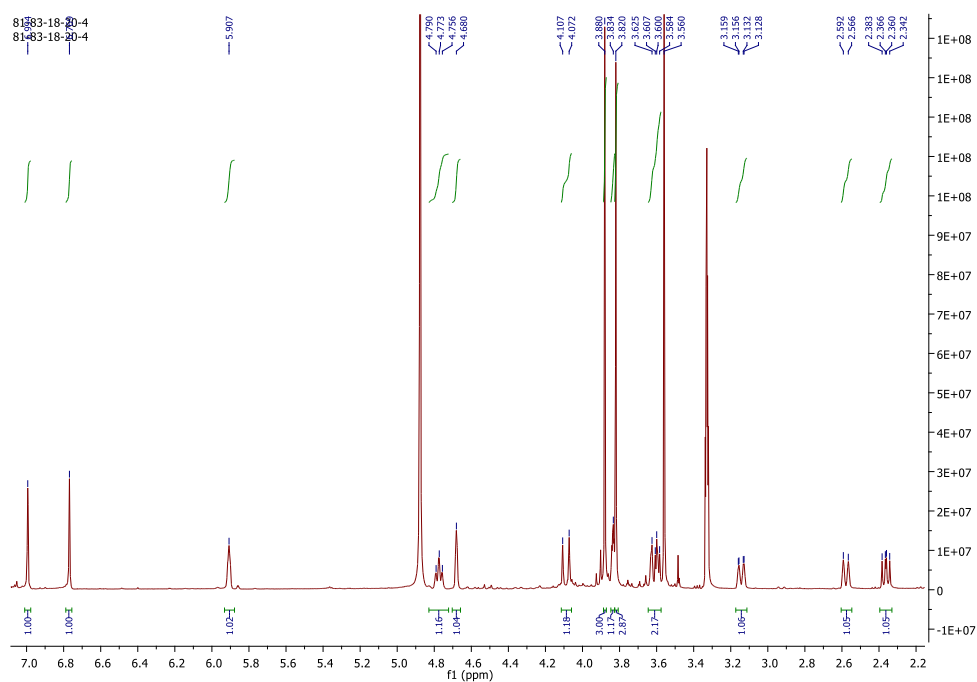

**Figure S9.**  $^{13}\text{C}$  NMR spectrum of 11-hydroxygalanthine (**23**) ( $\text{CD}_3\text{OD}$  on 100 MHz).

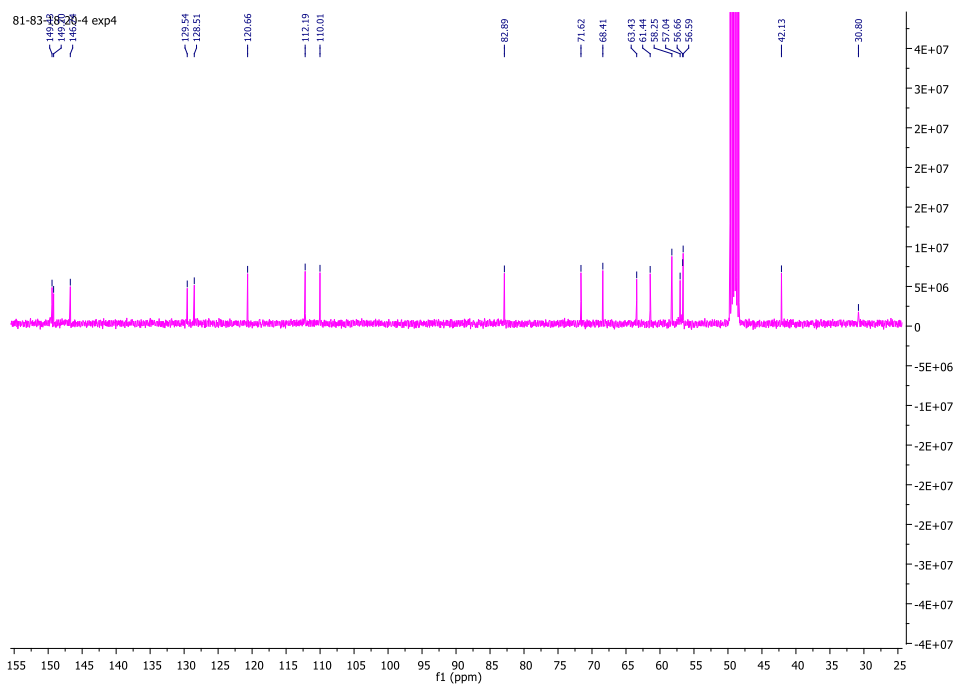

Supplement: Supplementary file 1 [file 17428310]
